# Supplementary material
Source: MDPI journal article supplement (https://www.mdpi.com/2076-3417/11/20/9420)
Supplement: s1 [file s1]

# On the improved mechanical properties of ball-milled GNPs Reinforced Short Chain Branched-Polyethylene nanocomposite: Micromechanical modeling and fractography study

Dimitra Kourtidou<sup>1</sup>, Konstantinos Tsongas<sup>2</sup>, Maria-Eirini Grigora<sup>2</sup>, Dimitrios Tzetzis<sup>2</sup>, Dimitrios N. Bikiaris<sup>3</sup> and Konstantinos Chrissafis<sup>1,\*</sup>

<sup>1</sup> School of Physics, Advanced Material and Devices Laboratory, Aristotle University of Thessaloniki, GR-541 24, Thessaloniki, Greece; dikourti@physics.auth.gr, hrisafis@physics.auth.gr

<sup>2</sup> Digital Manufacturing and Materials Characterization Laboratory, School of Science and Technology, Inter-national Hellenic University, 14km Thessaloniki, 57001 N. Moudania, Greece; k.tsongas@ihu.edu.gr, megrigora@gmail.com, d.tzetzis@ihu.edu.gr

<sup>3</sup> Department of Chemistry, Laboratory of Polymer Chemistry and Technology, Aristotle University of Thessaloniki, GR-541 24, Thessaloniki, Greece; dbic@chem.auth.gr

\* Correspondence: hrisafis@physics.auth.gr;

## Supplementary Material

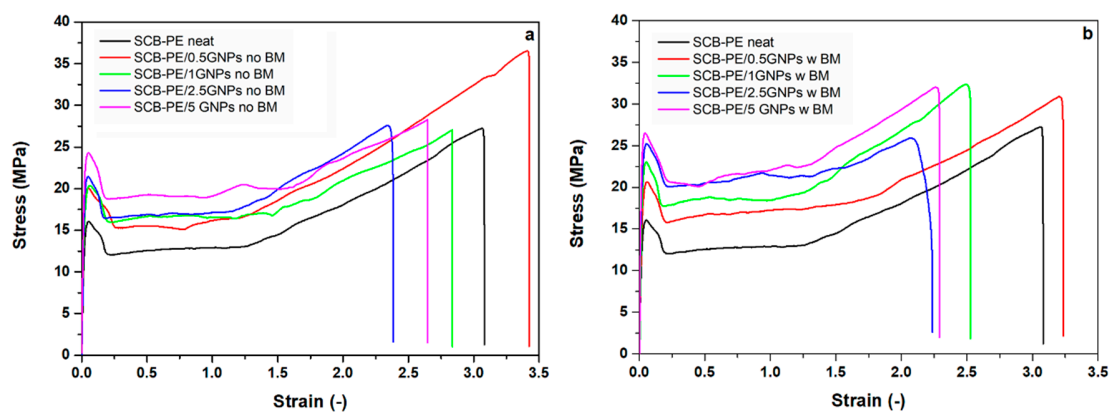

**Figure S1.** Representative tensile stress vs strain curves of neat SCB-PE, (a) SCB-PE/GNPs no BM and (b) SCB-PE/GNPs w BM nanocomposites.

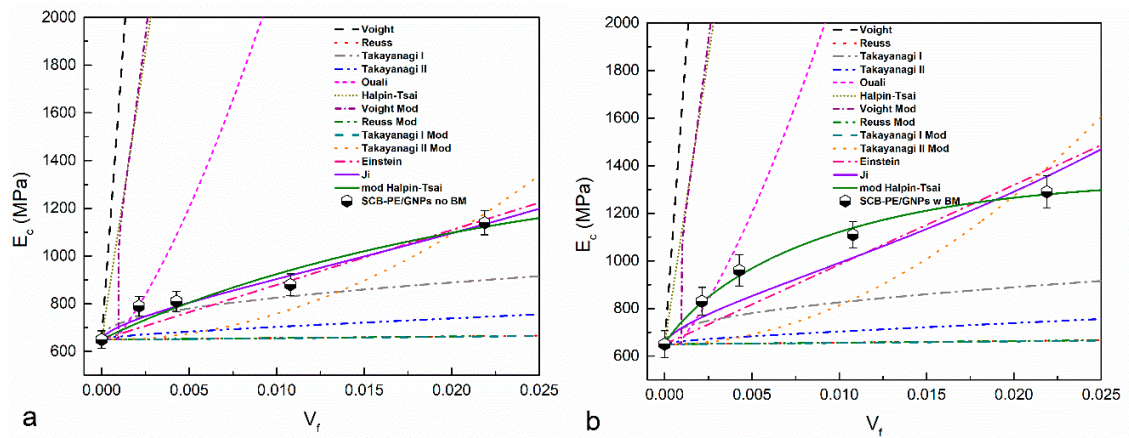

**Figure S2.** Theoretical modeling of elastic modulus for (a) the SCB-PE/GNPs no BM and (b) SCB-PE/GNPs w BM nanocomposites' experimental data as a function of filler volume fraction, using various micromechanical models.

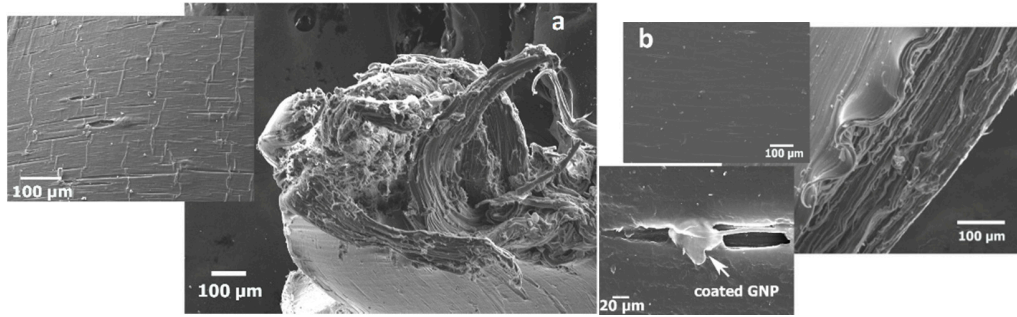

**Figure S3.** SEM images of the fracture surfaces of (a) SCB-PE/1 GNPs no BM and (b) SCB-PE/1 GNPs w BM.

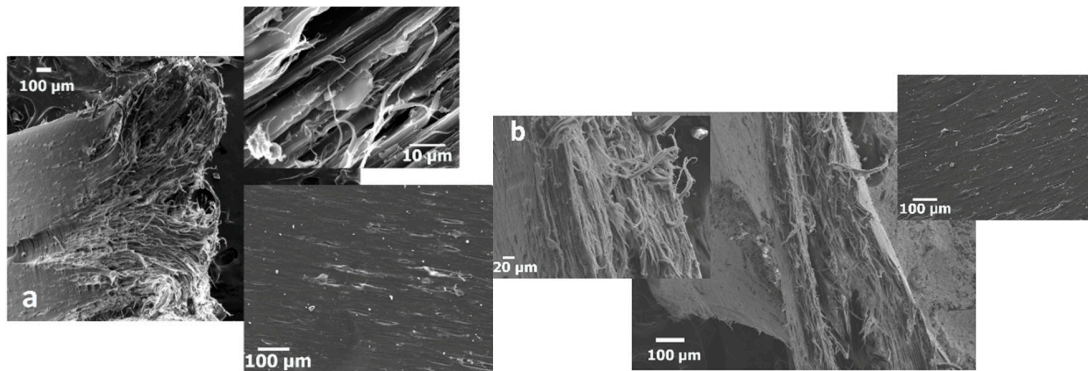

**Figure S4.** SEM images of the fracture surfaces of (a) SCB-PE/5 GNPs no BM and (b) SCB-PE/5 GNPs w BM.
